# Supplementary material for: New Insights into the Impact of Human Papillomavirus on Oral Cancer in Young Patients: Proteomic Approach Reveals a Novel Role for S100A8
Source: MDPI journal article supplement (doi:10.3390/cells12091323), 2023-05-05
Supplement: s1 [file s1]

Supplementary Figure 1

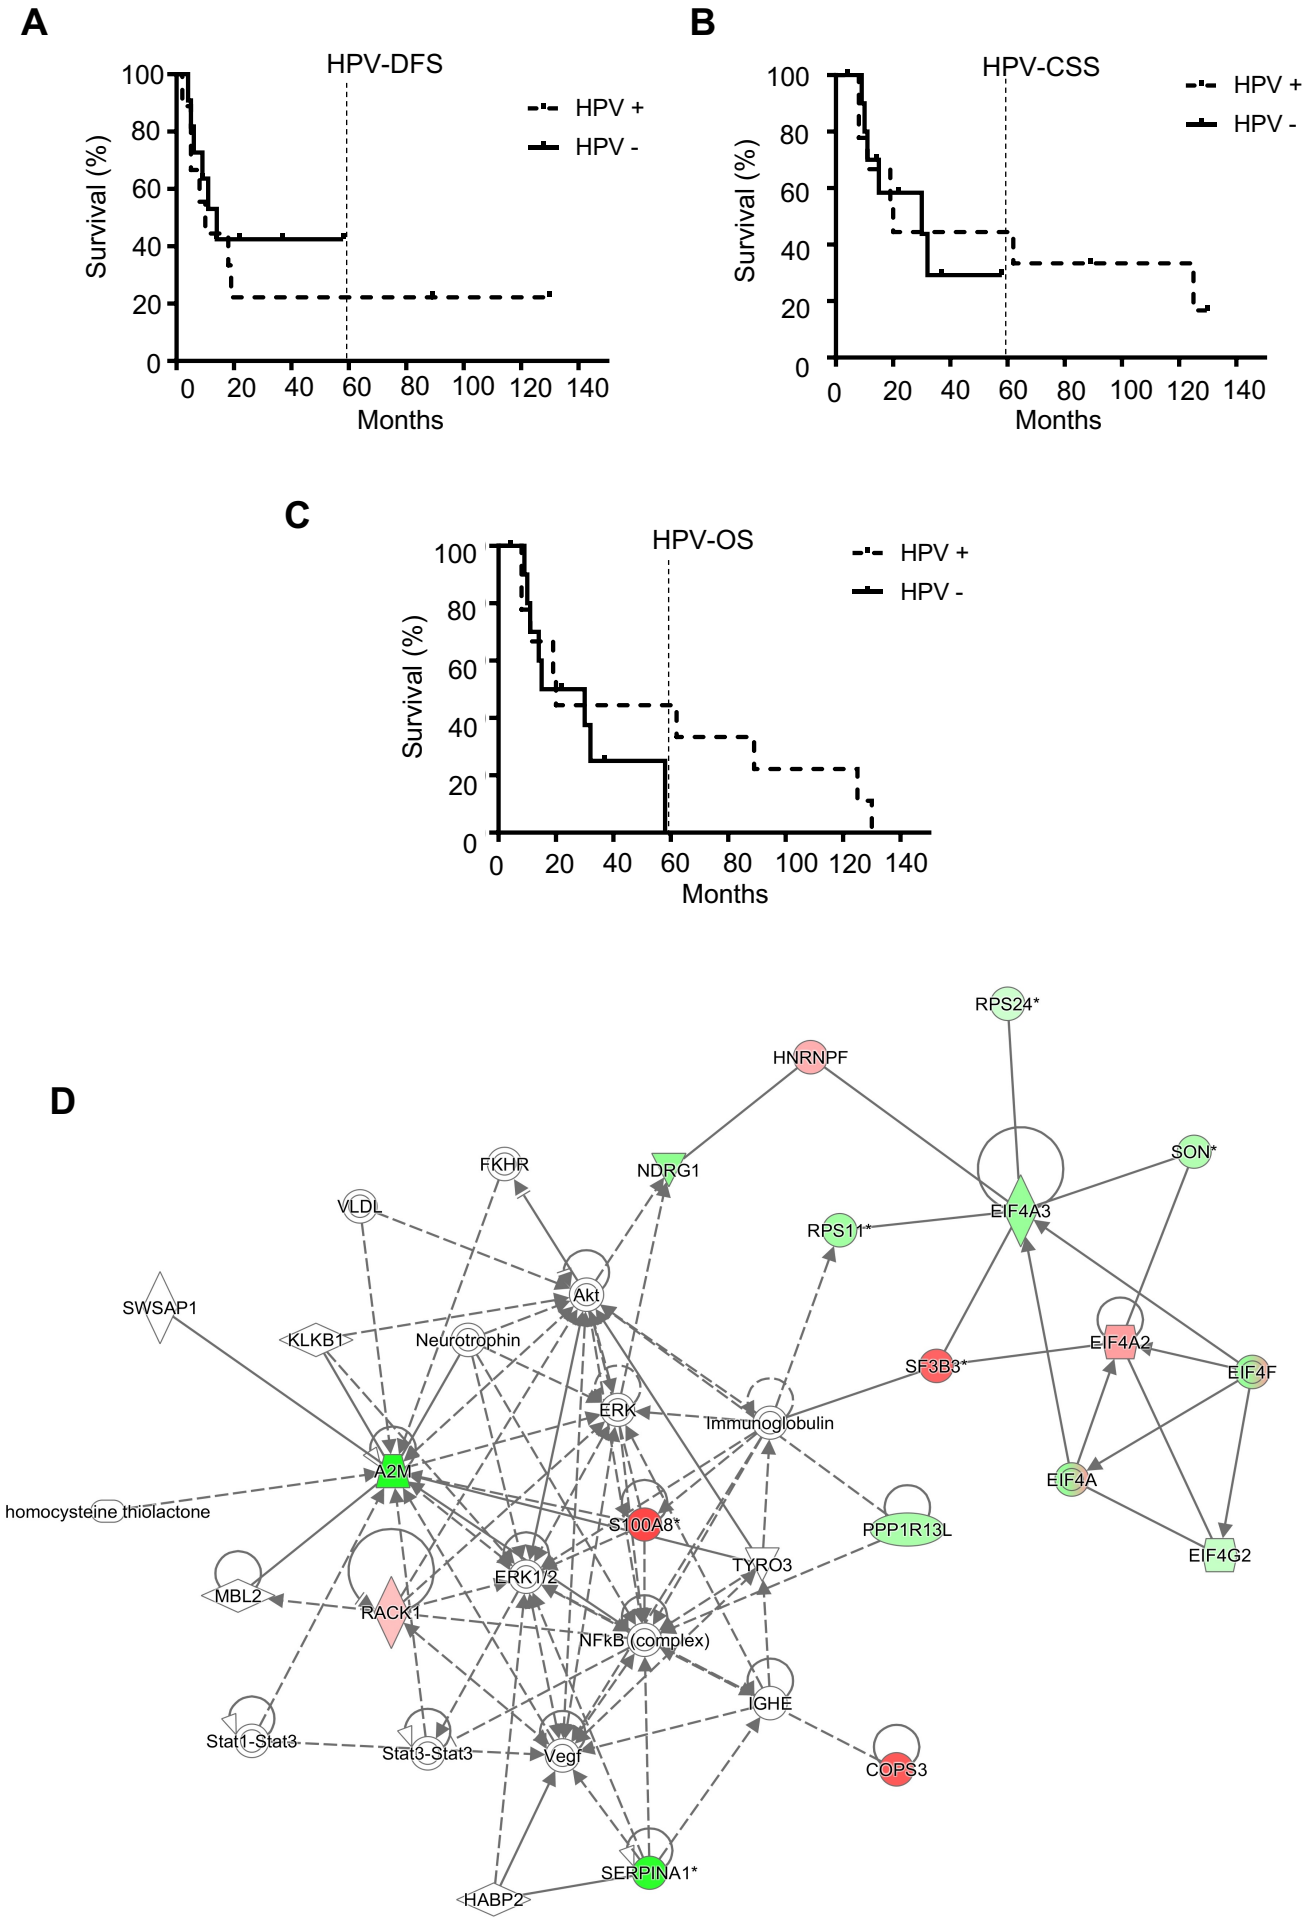



Supplementary Figure 2

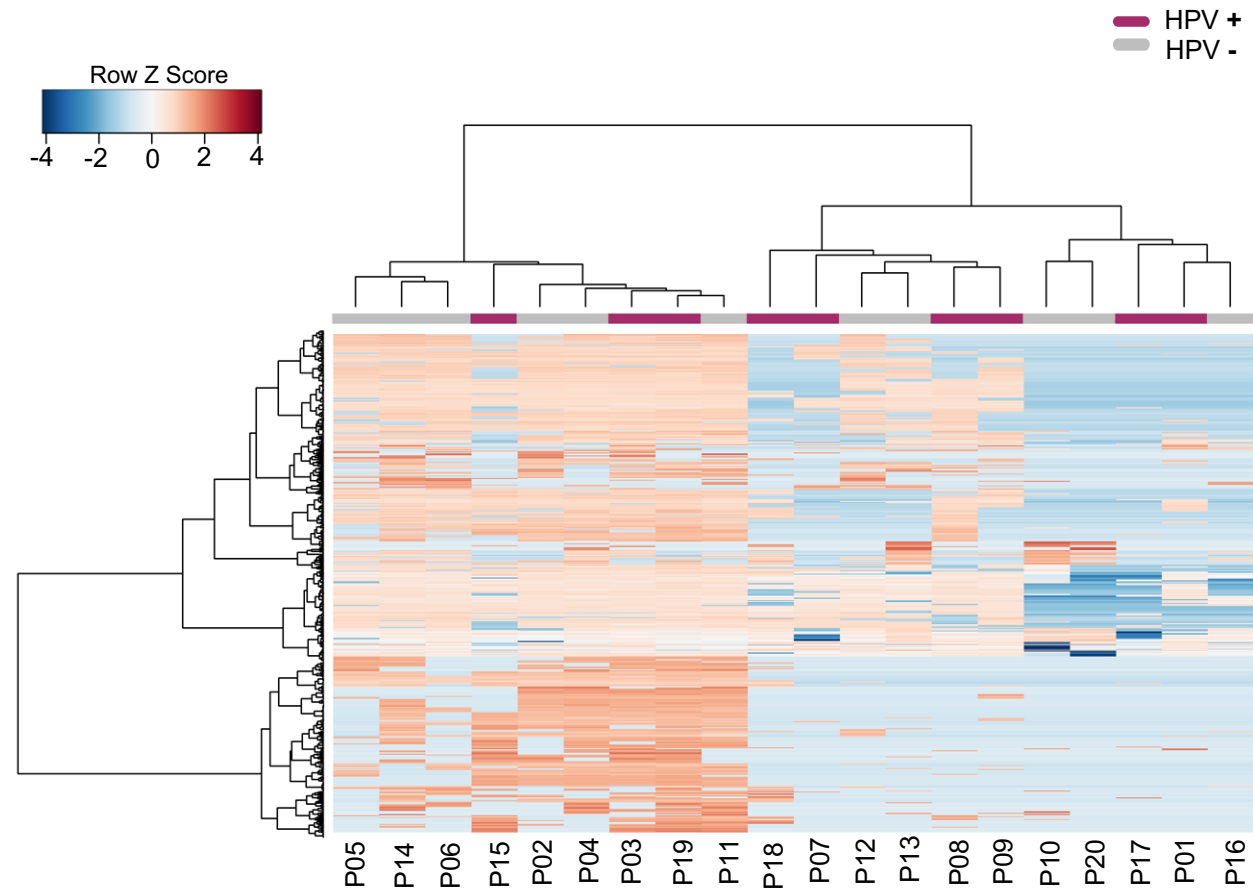



Supplementary Figure 3

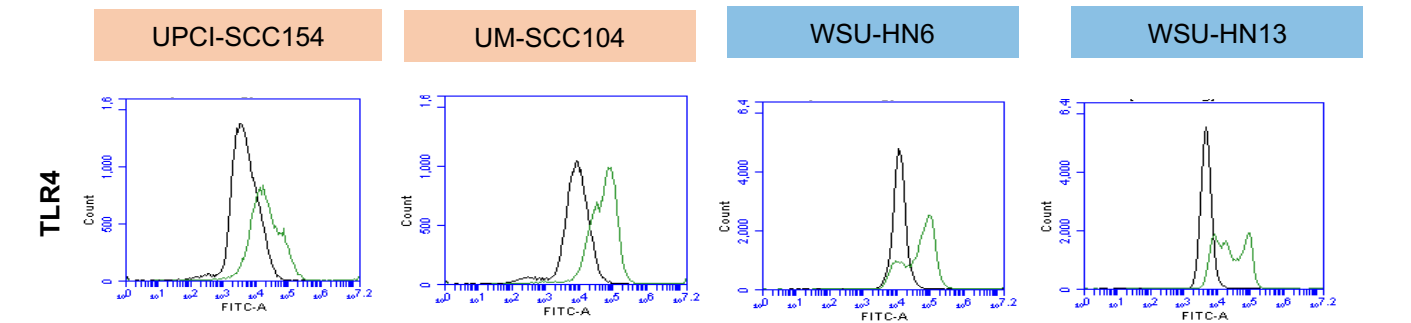



## SUPPLEMENTARY TABLES

**Supplementary Table 1.** Sociodemographic and clinicopathological features of the patients included in the proteomics analysis.

| <i>Feature</i>                      | <i>HPV(+)</i> | <i>HPV(-)</i> | <i>p value</i> |
|-------------------------------------|---------------|---------------|----------------|
|                                     | <i>n (%)</i>  |               |                |
| <b>Age</b>                          |               |               |                |
| Mean                                | 34,7          | 32,7          |                |
| Median                              | 37            | 35            | 0.656          |
| Range                               | 20-40         | 20-39         |                |
| <b>Sex</b>                          |               |               |                |
| Male                                | 6 (66,7)      | 6 (54,5)      | 0.670          |
| Female                              | 3 (33,3)      | 5 (45,5)      |                |
| <b>Tobacco consumption</b>          |               |               |                |
| Yes                                 | 5 (62,5)      | 10 (90,9)     | 0.262          |
| No                                  | 3 (37,5)      | 1 (9,1)       |                |
| <b>Alcohol consumption</b>          |               |               |                |
| Yes                                 | 3 (37,5)      | 10 (90,9)     | 0.041          |
| No                                  | 5 (62,5)      | 1 (9,1)       |                |
| <b>Anatomical site</b>              |               |               |                |
| Tongue                              | 3 (37,5)      | 4 (40)        | 0.84           |
| Floor of the mouth                  | 3 (37,5)      | 2 (20)        |                |
| Other                               | 2 (25)        | 4 (40)        |                |
| <b>T classification</b>             |               |               |                |
| T1/T2                               | 0 (0)         | 3 (27,3)      | 0.218          |
| T3/T4                               | 9 (100)       | 8 (72,7)      |                |
| <b>N classification</b>             |               |               |                |
| N0                                  | 5 (55,6)      | 3 (27,3)      | 0.362          |
| N1-N3                               | 4 (44,4)      | 8 (72,7)      |                |
| <b>Histological differentiation</b> |               |               |                |
| I                                   | 5 (55,6)      | 6 (54,5)      | 0.055          |
| II                                  | 4 (44,4)      | 3 (27,3)      |                |
| III                                 | 0 (0)         | 2 (18,2)      |                |
| <b>Surgical margins</b>             |               |               |                |
| Negative                            | 6 (85,7)      | 7 (63,6)      | 0.596          |
| Positive                            | 1 (14,3)      | 4 (36,4)      |                |
| <b>Treatment</b>                    |               |               |                |
| Surgery                             | 3 (33,3)      | 4 (36,4)      | 1              |
| Surgery +RT                         | 5 (55,6)      | 5 (45,5)      |                |
| Surgery +RT + CTX                   | 1 (11,1)      | 2 (18,2)      |                |
| <b>Recurrence</b>                   |               |               |                |
| Yes                                 | 7 (77,8)      | 6 (60)        | 0.628          |
| No                                  | 2 (22,2)      | 4 (40)        |                |

*Abbreviations:* HR-HPV (High-risk Human Papillomavirus), RT (radiotherapy), CTX, (chemotherapy).



**Supplementary Table 2.** Differentially expressed proteins between HPV+ and HPV - OSCC samples after Gene Ontology enrichment analysis, and miRNA prediction using samples in TCGA.

| Gene                           | Protein                                   | <i>p</i> value | Log2 ratio | miRNA fold change |
|--------------------------------|-------------------------------------------|----------------|------------|-------------------|
| <i>Up-regulated proteins</i>   |                                           |                |            |                   |
| RACK1                          | Receptor of activated protein C kinase 1  | <b>0.044</b>   | 0.61       | -                 |
| CAD                            | CAD protein                               | <b>0.019</b>   | 1.99       | -                 |
| RPL14                          | 60S ribosomal protein L14                 | <b>0.002</b>   | 1.12       | 1.72              |
| RPL29                          | 60S ribosomal protein L29                 | <b>0.048</b>   | 0.68       | -                 |
| EIF4A2                         | Eukaryotic initiation factor 4A-II        | <b>0.038</b>   | 0.94       | 1.90              |
| HNRNPF                         | Heterogeneous nuclear ribonucleoprote     | <b>0.021</b>   | 0.77       | -                 |
| SF3B3                          | Splicing factor 3B subunit 3              | <b>0.029</b>   | 1.52       | -                 |
| VAR5                           | Valine-tRNA ligase                        | <b>0.019</b>   | 1.66       | -                 |
| DYNC1H1                        | Cytoplasmic dynein 1 heavy chain          | <b>0.001</b>   | 1.49       | -1.42             |
| LRPPRC                         | Leucine-rich PPR motif-containing protein | <b>0.042</b>   | 1.02       | 3.11              |
| CKAP4                          | Cytoskeleton-associated protein 4         | <b>0.038</b>   | 1.50       | 2.00              |
| COPS3                          | COP9 signalosome complex subunit 3        | <b>0.023</b>   | 1.60       | 2.40              |
| S100A8                         | Protein S100-A8                           | <b>0.004</b>   | 1.80       | 1.97              |
| <i>Down-regulated proteins</i> |                                           |                |            |                   |
| RPL23                          | 60S ribosomal protein L23                 | <b>0.039</b>   | -0.99      | -                 |
| RPS11                          | 40S ribosomal protein S11                 | <b>0.023</b>   | -1.85      | -                 |
| RPS24                          | 40S ribosomal protein S24                 | <b>0.037</b>   | -0.975     | -                 |
| EIF4A3                         | Eukaryotic initiation factor 4A-III       | <b>0.004</b>   | -2.03      | -                 |
| NDRG1                          | NDRG1                                     | <b>0.001</b>   | -2.24      | 5.86              |
| EIF4G2                         | Eukaryotic translation initiation factor  | <b>0.008</b>   | -1.14      | 3.11              |
| PLP2                           | Proteolipid protein 2                     | <b>0.012</b>   | -1.77      | 1.47              |
| SERPINA1                       | Alpha-1-antitrypsin                       | <b>0.009</b>   | -4.20      | 1.74              |
| A2M                            | Alpha-2-macroglobulin                     | <b>0.004</b>   | -4.47      | 1.85              |
| HP1BP3                         | Heterochromatin protein 1-binding protein | <b>0.042</b>   | -1.04      | 2.58              |
| SON                            | SON                                       | <b>0.016</b>   | -1.52      | -                 |
| PPP1R13L                       | RelA-associated inhibitor                 | <b>0.015</b>   | -1.67      | -                 |
| YWHAH                          | 14-3-3 protein eta                        | <b>0.017</b>   | -1.73      | -                 |



**Supplementary Table 3.** Enriched biological processes p-value.

| <i>Differential expressed proteins</i>                              |         |                  |
|---------------------------------------------------------------------|---------|------------------|
| Term                                                                | p-value | Adjusted p-value |
| Viral process                                                       | 4.09    | 0.01             |
| Cellular protein metabolic process                                  | 3.58    | 0.01             |
| Viral gene expression                                               | 2.38    | 0.01             |
| Viral transcription                                                 | 2.71    | 0.01             |
| Protein targeting to ER                                             | 0.01    | 0.01             |
| SRP-dependent cotranslational protein targeting to membrane         | 8.41    | 0.01             |
| Cotranslational protein targeting to membrane                       | 1.04    | 0.01             |
| Nuclear-transcribed mRNA catabolic process                          | 4.22    | 0.01             |
| Nuclear-transcribed mRNA catabolic process, nonsense-mediated decay | 7.97    | 0.01             |
| <i>HPV (+) exclusive proteins</i>                                   |         |                  |
| Term                                                                | P-value | Adjusted P-value |
| Gene expression                                                     | 3.27    | 0.01             |
| Nuclear export                                                      | 2.10    | 0.01             |
| Neutrophil degranulation                                            | 1.22    | 0.01             |
| Neutrophil activation involved in immune response                   | 1.39    | 0.01             |
| Neutrophil mediated immunity                                        | 1.58    | 0.01             |
| mRNA transport                                                      | 5.10    | 0.01             |
| mRNA-containing ribonucleoprotein complex export from nucleus       | 3.50    | 0.01             |
| mRNA export from nucleus                                            | 5.58    | 0.01             |
| RNA export from nucleus                                             | 1.61    | 0.01             |
| RNA processing                                                      | 3.90    | 0.01             |
| <i>HPV(-) exclusive proteins</i>                                    |         |                  |
| Term                                                                | P-value | Adjusted P-value |
| Negative regulation of blood coagulation                            | 1.74    | 8.88             |
| Receptor-mediated endocytosis                                       | 1.15    | 6.53             |
| Humoral immune response mediated by circulating immunoglobulin      | 4.66    | 2.97             |
| Complement activation, classical pathway                            | 3.78    | 2.75             |
| Regulation of protein processing                                    | 8.60    | 7.32             |
| Regulation of acute inflammatory response                           | 2.48    | 2.53             |
| Regulation of protein activation cascade                            | 1.95    | 9.98             |
| Regulation of humoral immune response                               | 5.40    | 9.18             |
| Regulation of immune effector process                               | 6.57    | 8.39             |
| Regulation of complement activation                                 | 2.40    | 6.14             |



**Supplementary Table 4.** Correlation between S100A8 expression and clinicopathological features.

| <i>Variable</i>                    | <i>Category</i> | <i>S100A8</i> |             | <i>p</i>             |
|------------------------------------|-----------------|---------------|-------------|----------------------|
|                                    |                 | <i>Low</i>    | <i>High</i> |                      |
| <i>Sex</i>                         | <i>Male</i>     | 75.8          | 76.9        | <i>0.917</i>         |
|                                    | <i>Female</i>   | 24.2          | 23.1        |                      |
| <i>Tobacco use</i>                 | <i>Yes</i>      | 83.9          | 90.5        | <i>0.494</i>         |
|                                    | <i>No</i>       | 16.1          | 9.5         |                      |
| <i>Alcohol use</i>                 | <i>Yes</i>      | 64.5          | 66.7        | <i>0.873</i>         |
|                                    | <i>No</i>       | 35.5          | 33.3        |                      |
| <i>Anatomical site</i>             | <i>Tongue</i>   | 43.3          | 50          | <i>0.816</i>         |
|                                    | <i>Floor m.</i> | 33.3          | 25          |                      |
|                                    | <i>Other</i>    | 23.3          | 25          |                      |
| <i>Tumor</i>                       | <i>T1-T2</i>    | 36.4          | 11.5        | <b><i>0.030*</i></b> |
|                                    | <i>T3-T4</i>    | 63.6          | 88.5        |                      |
| <i>Node</i>                        | <i>N0</i>       | 0             | 0           | <i>ND</i>            |
|                                    | <i>N1-N3</i>    | 100           | 100         |                      |
| <i>Clinical stage</i>              | <i>I-II</i>     | 24.2          | 0           | <b><i>0.007*</i></b> |
|                                    | <i>III-IV</i>   | 75.8          | 100         |                      |
| <i>Histological classification</i> | <i>I</i>        | 60.6          | 72          | <i>0.448</i>         |
|                                    | <i>II</i>       | 30.3          | 16          |                      |
|                                    | <i>III</i>      | 9.1           | 12          |                      |
| <i>Surgical margins</i>            | <i>Negative</i> | 96.3          | 71.4        | <b><i>0.015*</i></b> |
|                                    | <i>Positive</i> | 3.7           | 28.6        |                      |
| <i>Recurrence</i>                  | <i>Yes</i>      | 48.5          | 26.9        | <i>0.092</i>         |
|                                    | <i>No</i>       | 51.5          | 73.1        |                      |

\* Statistically significant difference.
